# Supplementary material for: Iron Deposition in Brain: Does Aging Matter?
Source: MDPI journal article supplement (doi:10.3390/ijms231710018), 2022-09-02
Supplement: s1 [file s1]

## Supplementary Materials

Table S1 collected information about iron concentration and age in healthy people in different brain regions: Whole brain, Cortex, White matter, Putamen, Substantia Nigra, Red Nucleus, Thalamus, Globus Pallidus, Caudate Nucleus, Amygdala, Hippocampus, Dentate Nucleus. For each brain regions, we indicated the following details:

- Technique used for iron estimation (i.e., post-mortem analysis, in vivo MRI) and the relative parameters (i.e., T1, R2\*)
- Number of patients and age range (years) of the population
- Quantitative information for the relation between estimated iron concentration and age (i.e., Pearson coefficient, interpolation, regression coefficient)

| Brain region | Ref | Technique for iron estimation | N° of patients (N° of females) | Age range    | Relation Iron vs Age                                                                                                       |
|--------------|-----|-------------------------------|--------------------------------|--------------|----------------------------------------------------------------------------------------------------------------------------|
| Whole        | [1] | Post-mortem                   | 42 dead (F=15)                 | 53-101 years | $r^2=0.1534$ (NS)                                                                                                          |
| Cortex       | [2] | T1                            | 17 healthy (F=8)               | 51-77 years  | decreasing T1 rate in time= $5.1 \pm 7.81$ ms/year ( $p = 0.039$ )<br><br>$r = -0.59$ ( $p = 0.012$ ) relationship T1/iron |

|              |     |             |                     |             |                                                                                                                           |
|--------------|-----|-------------|---------------------|-------------|---------------------------------------------------------------------------------------------------------------------------|
| White matter | [2] | T1          | 17 healthy (F=8)    | 51-77 years | decreasing T1 rate in time $p = 0.38$                                                                                     |
|              | [3] | R2*         | 140 healthy (F=81)  | 20-74 years | $r^2=0.37$                                                                                                                |
|              | [4] | T1, QSM     | 95 healthy (F=57)   | 21-58 years | $r^2=0.09$                                                                                                                |
| Putamen      | [5] | QSM         | 67 healthy (F=35)   | 18-78 years | $r=0.3780$ (Pearson)<br>( $p=0.001$ )                                                                                     |
|              | [6] | R2*, QSM    | 498 healthy (F=286) | 5-90 years  | $R2^*(s-1)=0.58*Age-0.0008*Age^2+0.00004*Age^3+13.2$<br><br>$Susceptibility(ppb)=0.88*Age+0.002*Age^2+0.000055*Age^3-2.6$ |
|              | [7] | Post mortem | 7 dead (F=4)        | 57-91 years | $r^2=0.17$ ( $p=0.47$ )                                                                                                   |

|                  |      |             |                     |                            |                                                                   |
|------------------|------|-------------|---------------------|----------------------------|-------------------------------------------------------------------|
|                  | [1]  | Post mortem | 42 dead (F=15)      | 53-101 years; 5 age groups | $r^2=0.151$ (NS)                                                  |
|                  | [3]  | R2*         | 140 healthy (F=81)  | 20-74 years                | $r^2>0.4$                                                         |
|                  | [8]  | QSM         | 116 healthy (F=56)  | 20-79 years                | $\rho^2=0.48$<br>( $p=6*10^{-18}$ )                               |
|                  | [4]  | T1, QSM     | 95 healthy (F=57)   | 21-58 years                | $r^2=0.39$ ( $p<0.001$ )                                          |
|                  | [9]  | R2*         | 336 healthy (F=204) | 38-86 years                | Regression coefficient (beta= 2.55, 95% CI 1.12, 3.97, $p=0.01$ ) |
|                  | [10] | T2*, R2*    | 100 healthy (F=55)  | 20-70 years                | beta=0.466 ( $p<0.001$ )                                          |
| Substantia Nigra | [5]  | QSM         | 67 healthy (F=35)   | 18-78 years                | $r=0.0437$ (NS)                                                   |

|             |     |             |                    |             |                                    |
|-------------|-----|-------------|--------------------|-------------|------------------------------------|
|             | [8] | QSM         | 116 healthy (F=56) | 20-79 years | $\rho^2=0.21$<br>( $p=3*10^{-7}$ ) |
|             | [4] | T1, QSM     | 95 healthy (F=57)  | 21-58 years | $r^2=0.17$ ( $p<0.001$ )           |
| Red Nucleus | [5] | QSM         | 67 healthy (F=35)  | 18-78 years | $r=0.4840$ ( $p<0.0001$ )          |
|             | [8] | QSM         | 116 healthy (F=56) | 20-79 years | $\rho^2=0.32$ ( $p=3*10^{-11}$ )   |
|             | [4] | T1, QSM     | 95 healthy (F=57)  | 21-58 years | $r^2=0.32$ ( $p<0.001$ )           |
| Thalamus    | [5] | QSM         | 67 healthy (F=35)  | 18-78 years | $r=0.0784$ (NS)                    |
|             | [8] | QSM         | 116 healthy (F=56) | 20-79 years | $\rho^2=0.05$<br>(NS)              |
|             | [7] | Post mortem | 7 dead (F=4)       | 57-91 years | $r^2=0.14$ ( $p=0.47$ )            |

|                 |      |          |                     |             |                                                                                                                    |
|-----------------|------|----------|---------------------|-------------|--------------------------------------------------------------------------------------------------------------------|
|                 | [6]  | R2*, QSM | 498 healthy (F=286) | 5-90 years  | $R2^*(s-1)=1.17*Age-0.0008*Age^2+0.00004*Age^3+13.2$ $Susceptibility(ppb)=0.88*Age+0.002*Age^2+0.000055*Age^3-2.6$ |
|                 | [4]  | T1, QSM  | 95 healthy (F=57)   | 21-58 years | $r^2=0.06$ (NS)                                                                                                    |
|                 | [10] | T2*, R2* | 100 healthy (F=55)  | 20-70 years | $\beta=0.136$ ( $p=0.050$ )                                                                                        |
| Globus Pallidus | [5]  | QSM      | 67 healthy (F=35)   | 18-78 years | $r=0.3186$ (NS)                                                                                                    |
|                 | [8]  | QSM      | 116 healthy (F=56)  | 20-79 years | $\rho^2=0.01$<br>(NS)                                                                                              |

|                 |      |             |                     |                            |                                                                                                                           |
|-----------------|------|-------------|---------------------|----------------------------|---------------------------------------------------------------------------------------------------------------------------|
|                 | [6]  | R2*, QSM    | 498 healthy (F=286) | 5-90 years                 | $R2^*(s-1)=0.32*Age-0.02*Age^2+0.00013*Age^3+18.1$<br><br>Susceptibility(ppb)=<br>$4.39*Age-0.09*Age^2+0.0006*Age^3-45.3$ |
|                 | [1]  | Post mortem | 42 dead (F=15)      | 53-101 years; 5 age groups | $r^2=0.078$ (NS)                                                                                                          |
|                 | [4]  | T1, QSM     | 95 healthy (F=57)   | 21-58 years                | $r^2=0.16$ (p=0.22)                                                                                                       |
|                 | [10] | T2*, R2*    | 100 healthy (F=55)  | 20-70 years                | beta=0.281 (p=0.005)                                                                                                      |
| Caudate Nucleus | [5]  | QSM         | 67 healthy (F=35)   | 18-78 years                | r=0.0474 (NS)                                                                                                             |
|                 | [8]  | QSM         | 116 healthy (F=56)  | 20-79 years                | $\rho^2=0.23$<br><br>(p=7*10 <sup>-8</sup> )                                                                              |

|  |      |             |                     |                            |                                                                                                                         |
|--|------|-------------|---------------------|----------------------------|-------------------------------------------------------------------------------------------------------------------------|
|  | [6]  | R2*, QSM    | 498 healthy (F=286) | 5-90 years                 | $R2^*(s-1)=0.43*Age-0.007*Age^2+0.00004*Age^3+13.7$<br><br>Susceptibility(ppb)=<br>$1.85*Age-0.03*Age^2+0.0002*Age^3+2$ |
|  | [11] | T2*         | 113 Healthy (F=76)  | 19-83 years                | -0.54 (p<0.05)                                                                                                          |
|  | [1]  | Post mortem | 42 dead (F=15)      | 53-101 years; 5 age groups | r <sup>2</sup> =0.0094 (NS)                                                                                             |
|  | [3]  | R2*         | 140 healthy (F=81)  | 20-74 years                | r <sup>2</sup> >0.4                                                                                                     |
|  | [4]  | T1, QSM     | 95 healthy (F=57)   | 21-58 years                | r <sup>2</sup> =0.18 (p<0.001)                                                                                          |
|  | [10] | T2*, R2*    | 100 healthy (F=55)  | 20-70 years                | beta=0.1395 (p<0.001)                                                                                                   |

|                 |        |          |                    |             |                             |
|-----------------|--------|----------|--------------------|-------------|-----------------------------|
| Amygdala        | [5]    | QSM      | 67 healthy (F=35)  | 18-78 years | $r=0.2538$ (NS)             |
|                 | [8]    | QSM      | 116 healthy (F=56) | 20-79 years | $\rho^2=0.01$<br>(NS)       |
|                 | [10]   | T2*, R2* | 100 healthy (F=55) | 20-70 years | $\beta=0.251$ ( $p=0.015$ ) |
| Hippocampus     | [5]    | QSM      | 67 healthy (F=35)  | 18-78 years | $r=0.0300$ (NS)             |
|                 | [8]    | QSM      | 116 healthy (F=56) | 20-79 years | $\rho^2=0.03$<br>(NS)       |
|                 | ([11]) | T2*      | 113 Healthy (F=76) | 19-83 years | $-0.62$ ( $p>0.05$ )        |
|                 | [10]   | T2*, R2* | 100 healthy (F=55) | 20-70 years | $\beta=0.367$ ( $p=0.004$ ) |
| Dentate Nucleus | [5]    | QSM      | 67 healthy (F=35)  | 18-78 years | $r=0.2170$ (NS)             |



|  |     |         |                    |             |                                    |
|--|-----|---------|--------------------|-------------|------------------------------------|
|  | [8] | QSM     | 116 healthy (F=56) | 20-79 years | $\rho^2=0.14$<br>( $p=5*10^{-5}$ ) |
|  | [4] | T1, QSM | 95 healthy (F=57)  | 21-58 years | $r^2=0.08$                         |

F: Female; QSM: Quantitative Susceptibility Mapping

Beta: regression coefficient;  $r^2$ : Correlation Coefficient , Pearson, NS: Not Significant

## Bibliography

1. Ramos, P.; Santos, A.; Pinto, N.R.; Mendes, R.; Magalhães, T.; Almeida, A. Iron Levels in the Human Brain: A Post-Mortem Study of Anatomical Region Differences and Age-Related Changes. *Journal of Trace Elements in Medicine and Biology* **2014**, *28*, 13–17, doi:10.1016/j.jtemb.2013.08.001.
2. Gracien, R.-M.; Nürnberger, L.; Hok, P.; Hof, S.-M.; Reitz, S.C.; Rüb, U.; Steinmetz, H.; Hilker-Roggendorf, R.; Klein, J.C.; Deichmann, R.; et al. Evaluation of Brain Ageing: A Quantitative Longitudinal MRI Study over 7 Years. *Eur Radiol* **2017**, *27*, 1568–1576, doi:10.1007/s00330-016-4485-1.
3. Cherubini, A.; Caligiuri, M.E.; Péran, P.; Sabatini, U.; Cosentino, C.; Amato, F. Importance of Multimodal MRI in Characterizing Brain Tissue and Its Potential Application for Individual Age Prediction. *IEEE Journal of Biomedical and Health Informatics* **2016**, *20*, 1232–1239, doi:10.1109/JBHI.2016.2559938.
4. Burgetova, R.; Dusek, P.; Burgetova, A.; Pudlac, A.; Vaneckova, M.; Horakova, D.; Krasensky, J.; Varga, Z.; Lambert, L. Age-Related Magnetic Susceptibility Changes in Deep Grey Matter and Cerebral Cortex of Normal Young and Middle-Aged Adults Depicted by Whole Brain Analysis. *Quantitative Imaging in Medicine and Surgery* **2021**, *11*, 3906919–3903919, doi:10.21037/qims-21-87.
5. Howard, C.M.; Jain, S.; Cook, A.D.; Packard, L.E.; Mullin, H.A.; Chen, N.; Liu, C.; Song, A.W.; Madden, D.J. Cortical Iron Mediates Age-Related Decline in Fluid Cognition. *Human Brain Mapping* **2022**, *43*, 1047–1060, doi:10.1002/hbm.25706.

6. Treit, S.; Naji, N.; Seres, P.; Rickard, J.; Stolz, E.; Wilman, A.H.; Beaulieu, C. R2\* and Quantitative Susceptibility Mapping in Deep Gray Matter of 498 Healthy Controls from 5 to 90 Years. *Human Brain Mapping* **2021**, *42*, 4597–4610, doi:10.1002/hbm.25569.
7. McAllum, E.J.; Hare, D.J.; Volitakis, I.; McLean, C.A.; Bush, A.I.; Finkelstein, D.I.; Roberts, B.R. Regional Iron Distribution and Soluble Ferroprotein Profiles in the Healthy Human Brain. *Progress in Neurobiology* **2020**, *186*, 101744, doi:10.1016/j.pneurobio.2019.101744.
8. Acosta-Cabronero, J.; Betts, M.J.; Cardenas-Blanco, A.; Yang, S.; Nestor, P.J. In Vivo MRI Mapping of Brain Iron Deposition across the Adult Lifespan. *J. Neurosci.* **2016**, *36*, 364–374, doi:10.1523/JNEUROSCI.1907-15.2016.
9. Ghadery, C.; Pirpamer, L.; Hofer, E.; Langkammer, C.; Petrovic, K.; Loitfelder, M.; Schwingenschuh, P.; Seiler, S.; Duering, M.; Jouvent, E.; et al. R2\* Mapping for Brain Iron: Associations with Cognition in Normal Aging. *Neurobiology of Aging* **2015**, *36*, 925–932, doi:10.1016/j.neurobiolaging.2014.09.013.
10. Cherubini, A.; Péran, P.; Caltagirone, C.; Sabatini, U.; Spalletta, G. Aging of Subcortical Nuclei: Microstructural, Mineralization and Atrophy Modifications Measured in Vivo Using MRI. *NeuroImage* **2009**, *48*, 29–36, doi:10.1016/j.neuroimage.2009.06.035.
11. Rodrigue, K.M.; Daugherty, A.M.; Haacke, E.M.; Raz, N. The Role of Hippocampal Iron Concentration and Hippocampal Volume in Age-Related Differences in Memory. *Cerebral Cortex* **2013**, *23*, 1533–1541, doi:10.1093/cercor/bhs139.
